# Supplementary material for: Adipose-derived mesenchymal stem cells (AdMSC) for the treatment of secondary-progressive multiple sclerosis: A triple blinded, placebo controlled, randomized phase I/II safety and feasibility study
Source: PLOS journal article supplement (doi:10.1371/journal.pone.0195891), 2018-05-16
Supplement: S5 (10.1371/journal.pone.0195891.s005) [file journal.pone.0195891.s005]

ClinicalTrials.gov is getting an update. Our new design arrives on June 19th. [Learn more.](#)

[Preview our new design at ClinicalTrials.gov/beta/](#)

[Show less](#)

## ClinicalTrials.gov

**IMPORTANT:** Listing of a study on this site does not reflect endorsement by the National Institutes of Health. Talk with a trusted healthcare professional before volunteering for a study. [Read more...](#)

Trial record **1 of 1** for: NCT01056471

[Previous Study](#) | [Return to List](#) | [Next Study](#)

### Autologous Mesenchymal Stem Cells From Adipose Tissue in Patients With Secondary Progressive Multiple Sclerosis

**This study has been completed.**

**Sponsor:**

Andalusian Initiative for Advanced Therapies - Fundación Pública Andaluza Progreso y Salud

**Collaborator:**

Carlos III Health Institute

**Information provided by (Responsible Party):**

Andalusian Initiative for Advanced Therapies - Fundación Pública Andaluza Progreso y Salud

**ClinicalTrials.gov Identifier:**

NCT01056471

First received: January 25, 2010

Last updated: August 4, 2015

Last verified: February 2015

[History of Changes](#)

[Full Text View](#)

[Tabular View](#)

[No Study Results Posted](#)

[Disclaimer](#)

[How to Read a Study Record](#)

#### Purpose

The main purpose of this study is to evaluate the safety and feasibility of regenerative therapy with mesenchymal stem cells from adipose tissue, administered intravenously in patients with secondary progressive multiple sclerosis who do not respond to treatment.

| <a href="#">Condition</a>                                                                                                                                                                 | <a href="#">Intervention</a>                                  | <a href="#">Phase</a> |
|-------------------------------------------------------------------------------------------------------------------------------------------------------------------------------------------|---------------------------------------------------------------|-----------------------|
| Autoimmune Diseases<br>Immune System Diseases<br>Demyelinating Diseases<br>Nervous System Diseases<br>Demyelinating Autoimmune Diseases, CNS<br>Autoimmune Diseases of the Nervous System | Other: Autologous mesenchymal stem cells from adipose tissue. | Phase 1<br>Phase 2    |

Study Type: Interventional

Study Design: Allocation: Randomized

Intervention Model: Parallel Assignment

Masking: Double Blind (Participant, Care Provider, Investigator, Outcomes Assessor)

Primary Purpose: Treatment

Official Title: Multicenter Clinical Trial Phase I / II Randomized, Placebo-controlled Study to Evaluate Safety and Feasibility of Therapy With Two Different Doses of Autologous Mesenchymal Stem Cells in Patients With Secondary Progressive Multiple Sclerosis Who do Not Respond to Treatment

**Resource links provided by NLM:**

[Genetics Home Reference](#) related topics: [multiple sclerosis](#)

[MedlinePlus](#) related topics: [Multiple Sclerosis](#)

[U.S. FDA Resources](#)

**Further study details as provided by Andalusian Initiative for Advanced Therapies - Fundación Pública Andaluza Progreso y Salud:**

## Primary Outcome Measures:

- To evaluate safety and tolerability related to the intravenous infusion of autologous mesenchymal stem cells [ Time Frame: 12 months. ]

## Secondary Outcome Measures:

- To evaluate effects on MS disease activity measured by: clinical variables, imaging variables, immunological and neurophysiologic analysis, neuropsychological and quality of life scales. [ Time Frame: 12 months ]

Enrollment: 30  
Study Start Date: January 2010  
Study Completion Date: June 2015  
Primary Completion Date: June 2012 (Final data collection date for primary outcome measure)

| Arms                                                                                              | Assigned Interventions                                                                                                                           |
|---------------------------------------------------------------------------------------------------|--------------------------------------------------------------------------------------------------------------------------------------------------|
| Experimental: Low dose autologous mesenchymal cells<br>The dose of infused cells is 10e6 cells/Kg | Other: Autologous mesenchymal stem cells from adipose tissue.<br>Intravenous infusion of autologous mesenchymal stem cells. Dose: 10e6 cells/Kg. |
| Experimental: High dose<br>The dose of infused cells is 4*10e6 cells/Kg                           | Other: Autologous mesenchymal stem cells from adipose tissue.<br>Intravenous infusion of autologous mesenchymal stem cells.Dose:4*10e6 cells/Kg. |
| No Intervention: Placebo Control                                                                  |                                                                                                                                                  |

 **Eligibility**

Ages Eligible for Study: 18 Years and older (Adult, Senior)  
Sexes Eligible for Study: All  
Accepts Healthy Volunteers: No

**Criteria**

## Inclusion Criteria:

1. Patients diagnosed with Multiple Sclerosis (Poser and McDonald criteria).
2. Secondary progressive MS patients with EDSS  $\geq 5.5$  and  $\leq 9$ .
3. Patients with treatment failure defined by: no response to immunomodulators / immunosuppressants, and showing activity in the form of 1 relapse in the last year or 0.5 points in EDSS progression.
4. Patients with no MS relapse and no steroid treatment within the month prior to inclusion.
5. Patients who give written consent to participate in the study. -

## Exclusion Criteria:

1. History of current pathology or current laboratory results indicative of any severe disease.
2. Pacemaker or metallic implants that prevent MR imaging.
3. Inability to complete questionnaires.
4. Refusal to give informed consent.
5. Predicted impossibility for a biopsy of at least 30 grams of fat tissue.
6. Positive screening test for HIV, Hepatitis B or Hepatitis C.
7. History of malignancy.
8. Having been in treatment with any investigational drug or have undergone any experimental procedure in the 3 months prior to baseline.
9. Body mass index  $> 40$  kg/m<sup>2</sup>.
10. Patients who have been treated with prohibited concomitant medication during the month prior to inclusion in the study.
11. Pregnancy or lactation

 **Contacts and Locations**

Choosing to participate in a study is an important personal decision. Talk with your doctor and family members or friends about deciding to join a study. To learn more about this study, you or your doctor may contact the study research staff using the Contacts provided below. For general information, see [Learn About Clinical Studies](#).

Please refer to this study by its ClinicalTrials.gov identifier: NCT01056471

## Locations

### Spain

Hospital Regional Universitario de Málaga  
Málaga, Spain, 29010

Hospital Universitario Virgen Macarena  
Sevilla, Spain, 41004

### Sponsors and Collaborators

Andalusian Initiative for Advanced Therapies - Fundación Pública Andaluza Progreso y Salud

Carlos III Health Institute

### Investigators

Study Director: Oscar Fernandez Fernandez, MD, PhD Hospital Regional Universitario Carlos Haya, Málaga, Spain.

Principal Investigator: Guillermo Izquierdo Ayuso, MD, PhD Hospital Universitario Virgen Macarena, Sevilla, Spain

## ▶ More Information

Additional Information:

[Andalusian Molecular Biology and Regenerative Medicine Centre](#) 

Responsible Party: Andalusian Initiative for Advanced Therapies - Fundación Pública Andaluza Progreso y Salud

ClinicalTrials.gov Identifier: [NCT01056471](#) [History of Changes](#)

Other Study ID Numbers: CMM/EM/2008

Study First Received: January 25, 2010

Last Updated: August 4, 2015

Keywords provided by Andalusian Initiative for Advanced Therapies - Fundación Pública Andaluza Progreso y Salud:

Multiple Sclerosis

Mesenchymal Stem Cells

Autologous

Additional relevant MeSH terms:

Sclerosis

Multiple Sclerosis

Nervous System Diseases

Autoimmune Diseases

Immune System Diseases

Multiple Sclerosis, Chronic Progressive

Demyelinating Autoimmune Diseases, CNS

Autoimmune Diseases of the Nervous System

Demyelinating Diseases

Pathologic Processes

Leukoencephalopathies

Brain Diseases

Central Nervous System Diseases

ClinicalTrials.gov processed this record on June 02, 2017
